# Supplementary material for: Efficacy of the Adjunct Use of Povidone-Iodine or Sodium Hypochlorite with Non-Surgical Management of Periodontitis: A Systematic Review and Meta-Analysis
Source: MDPI journal article supplement (doi:10.3390/jcm11216593), 2022-11-07
Supplement: s1 [file s1]

## Database Search

**PubMed [Date of search: Sept 10, 2022]:**

| No | Search Query                                                                                                                                                                                                                                                                                                                                                                      | Results |
|----|-----------------------------------------------------------------------------------------------------------------------------------------------------------------------------------------------------------------------------------------------------------------------------------------------------------------------------------------------------------------------------------|---------|
| #1 | Periodontitis OR peri-odontitis OR "Periodontitis"[Mesh]                                                                                                                                                                                                                                                                                                                          | 121,354 |
| #2 | "sodium hypochlorite" OR NaOCl OR "Sodium Hypochlorite"[Mesh]                                                                                                                                                                                                                                                                                                                     | 10,213  |
| #3 | Betadine OR "povidone iodine" OR povidone-iodine OR providine OR disadine OR isodine OR "Povidone-iodine"[Mesh]                                                                                                                                                                                                                                                                   | 5,222   |
| #4 | #2 OR #3                                                                                                                                                                                                                                                                                                                                                                          | 15,266  |
| #5 | "nonsurgical periodontal treatment" OR "non-surgical periodontal treatment" OR "nonsurgical periodontal therapy" OR "non-surgical periodontal therapy" OR "nonsurgical treatment" OR "non-surgical treatment" OR "conventional treatment" OR "mechanical debridement" OR "subgingival irrigation" OR "scaling and root planing" OR "scaling root planing" OR "Root Planing"[Mesh] | 25,045  |
| #6 | #1 AND #4 AND #5                                                                                                                                                                                                                                                                                                                                                                  | 73      |

**Scopus [Date of search: Sept 9, 2022]:**

| No | Search Query                                                                                                                                                                                                                                                                                                                                                                                                                | Results |
|----|-----------------------------------------------------------------------------------------------------------------------------------------------------------------------------------------------------------------------------------------------------------------------------------------------------------------------------------------------------------------------------------------------------------------------------|---------|
| #1 | ALL (Periodontitis) OR ALL (peri-odontitis)                                                                                                                                                                                                                                                                                                                                                                                 | 112686  |
| #2 | ALL ("sodium hypochlorite") OR ALL (NaOCl)                                                                                                                                                                                                                                                                                                                                                                                  | 39500   |
| #3 | ALL (Betadine) OR ALL ("povidone iodine") OR ALL (povidone-iodine) OR ALL (providine) OR ALL (disadine) OR ALL (isodine)                                                                                                                                                                                                                                                                                                    | 25456   |
| #4 | #2 OR #3                                                                                                                                                                                                                                                                                                                                                                                                                    | 64130   |
| #5 | ALL ("nonsurgical periodontal treatment") OR ALL ("non-surgical periodontal treatment") OR ALL ("nonsurgical periodontal therapy") OR ALL ("non-surgical periodontal therapy") OR ALL ("nonsurgical treatment") OR ALL ("non-surgical treatment") OR ALL ("conventional treatment") OR ALL ("mechanical debridement") OR ALL ("subgingival irrigation") OR ALL ("scaling and root planing") OR ALL ("scaling root planing") | 118494  |
| #6 | #1 AND #4 AND #5                                                                                                                                                                                                                                                                                                                                                                                                            | 650     |

**Web of Science [Date of search: Sept 9, 2022]:**

| No | Search Query                                                                                                                                                                                                                                                                                                                                                                                          | Results |
|----|-------------------------------------------------------------------------------------------------------------------------------------------------------------------------------------------------------------------------------------------------------------------------------------------------------------------------------------------------------------------------------------------------------|---------|
| #1 | ALL=Periodontitis OR ALL=peri-odontitis                                                                                                                                                                                                                                                                                                                                                               | 35638   |
| #2 | ALL="sodium hypochlorite" OR ALL=NaOCl                                                                                                                                                                                                                                                                                                                                                                | 12217   |
| #3 | ALL=Betadine OR ALL="povidone iodine" OR ALL=povidone-iodine OR ALL=providine OR ALL=disadine OR ALL=isodine                                                                                                                                                                                                                                                                                          | 5277    |
| #4 | #2 OR #3                                                                                                                                                                                                                                                                                                                                                                                              | 17362   |
| #5 | ALL="nonsurgical periodontal treatment" OR ALL="non-surgical periodontal treatment" OR ALL="nonsurgical periodontal therapy" OR ALL="non-surgical periodontal therapy" OR ALL="nonsurgical treatment" OR ALL="non-surgical treatment" OR ALL="conventional treatment" OR ALL="mechanical debridement" OR ALL="subgingival irrigation" OR ALL="scaling and root planing" OR ALL="scaling root planing" | 24254   |
| #6 | #1 AND #4 AND #5                                                                                                                                                                                                                                                                                                                                                                                      | 64      |

**CENTRAL [Date of search: Sept 9, 2022]:**

| No | Search Query                                                                                                                                                                                                                                                                                                                    | Results |
|----|---------------------------------------------------------------------------------------------------------------------------------------------------------------------------------------------------------------------------------------------------------------------------------------------------------------------------------|---------|
| #1 | Periodontitis OR peri-odontitis                                                                                                                                                                                                                                                                                                 | 6102    |
| #2 | "sodium hypochlorite" OR NaOCl                                                                                                                                                                                                                                                                                                  | 1087    |
| #3 | Betadine OR "povidone iodine" OR povidone-iodine OR providine OR disadine OR isodine                                                                                                                                                                                                                                            | 1984    |
| #4 | #2 OR #3                                                                                                                                                                                                                                                                                                                        | 3040    |
| #5 | "nonsurgical periodontal treatment" OR "non-surgical periodontal treatment" OR "nonsurgical periodontal therapy" OR "non-surgical periodontal therapy" OR "nonsurgical treatment" OR "non-surgical treatment" OR "conventional treatment" OR "mechanical debridement" OR "subgingival irrigation" OR "scaling and root planing" | 1683    |
| #6 | #1 AND #4 AND #5                                                                                                                                                                                                                                                                                                                | 16      |

**Clinicaltrials.gov [Date of search: Sept 9, 2022]:**

| No | Search Query | Results |
|----|--------------|---------|
| #1 |              |         |
| #2 |              |         |
| #3 |              |         |
| #4 |              |         |
| #5 |              |         |
| #6 |              |         |

**Google Scholar [Date of search: Sept 9, 2022]:**

| No                             | Search Query                                                                                   | Results |
|--------------------------------|------------------------------------------------------------------------------------------------|---------|
| With all of the words          | Periodontitis non surgical                                                                     |         |
| With the exact phrase          |                                                                                                |         |
| With at least one of the words | "sodium chlorite" "povidone iodine" povidone-iodine NaOCl                                      |         |
| Total                          | As per the guidelines, only the 1 <sup>st</sup> 100-200 records will be retrieved and screened |         |
